# Supplementary material for: Enhanced combined sewer overflow treatment by rapid magnetic flocculation–magnetic sedimentation: efficiency and mechanism
Source: Royal Society of Chemistry journal article supplement (doi:10.1039/d4ew00242c), 2024-01-01
Supplement: d4ew00242c1.pdf [file d4ew00242c1.pdf]

1 **Supplementary Material**  
2 *for*  
3 **Enhanced combined sewer overflow treatment by rapid**  
4 **magnetic flocculation–magnetic sedimentation: Efficiency**  
5 **and mechanism**

6 Changyang Xie <sup>a, b, c</sup>, Xinyue Li <sup>a</sup>, Zhenzhen Tang <sup>a, b, c</sup>, Wenhai Chu <sup>a, b, c, \*</sup>, Huaizheng  
7 Li <sup>a, b, c, \*</sup>

8 <sup>a</sup> State Key Laboratory of Pollution Control and Resources Reuse, College of  
9 Environmental Science and Engineering, Tongji University, 200092 Shanghai, China

10 <sup>b</sup> Key Laboratory of Yangtze River Water Environment, Ministry of Education, Tongji  
11 University, 200092 Shanghai, China

12 <sup>c</sup> Shanghai Institute of Pollution Control and Ecological Security, Shanghai 200092,  
13 China

14

15 **\*Corresponding author:**

16 Tel.: +8618721871983; fax: +86 21 65986839.

17 E-mail address: feedwater@126.com (W. Chu), lihztg@yeah.net (H. Li).

18 Address: Room 401 (H. Li), National Engineering Research Center for Urban Pollution  
19 Control, 1239 Siping Road, Yangpu District, Shanghai, 200092, China. Room 407 (W.  
20 Chu), National Engineering Research Center for Urban Pollution Control, 1239 Siping  
21 Road, Yangpu District, Shanghai, 200092, China.

|    |                                                                                                      |    |
|----|------------------------------------------------------------------------------------------------------|----|
| 22 | <b>Table of Contents</b>                                                                             |    |
| 23 | <b>Enhanced combined sewer overflow treatment by rapid magnetic flocculation–magnetic</b>            |    |
| 24 | <b>sedimentation: Efficiency and mechanism</b> .....                                                 | 1  |
| 25 | <b>Fig. S1.</b> External dimensions of magnetic field generation system. ....                        | 4  |
| 26 | <b>Fig. S2.</b> Effects of gravity and magnetic sedimentation on the removal efficiency of COD, TN,  |    |
| 27 | and TP, pH = 7.0 ± 0.1, T = 25 ± 1 °C. ....                                                          | 5  |
| 28 | <b>Fig. S3.</b> Particle sizes, fractal dimensions (a) and saturation magnetization intensity (b) of |    |
| 29 | magnetic coagulation with different magnetic particle dosages, pH = 7.0 ± 0.1, T = 25 ± 1 °C.        |    |
| 30 | .....                                                                                                | 6  |
| 31 | <b>Fig. S4.</b> Morphological structures of the flocs generated by different magnetic particle       |    |
| 32 | dosages, pH = 7.0 ± 0.1, T = 25 ± 1 °C. ....                                                         | 7  |
| 33 | <b>Fig. S5.</b> Effects of pH on the removal efficiency of COD, TN, and TP, T = 25 ± 1 °C. ....      | 8  |
| 34 | <b>Fig. S6.</b> Validation experiments conducted on typical CSO with high pollution. pH 7.0 ± 0.1,   |    |
| 35 | T = 25 ± 1 °C. ....                                                                                  | 9  |
| 36 | <b>Fig. S7.</b> Effect of weather conditions on the molecular weight distribution of dissolved       |    |
| 37 | organic matter in CSOs. The number of sunny days in the early stage for the samples in (a)           |    |
| 38 | was 0, while the average rainfall intensity for the samples in (b) was 1.67 mm/h. ....               | 10 |
| 39 | <b>Tab. S1.</b> Rainfall conditions of different CSOs. ....                                          | 11 |
| 40 | <b>Tab. S2.</b> Specific parameters of magnetic field generation system. ....                        | 12 |
| 41 | <b>Tab. S3.</b> Level of factors. ....                                                               | 13 |

|    |                                                                                                  |    |
|----|--------------------------------------------------------------------------------------------------|----|
| 42 | <b>Tab. S4.</b> Orthogonal experimental results.....                                             | 14 |
| 43 | <b>Tab. S5.</b> Experimental factor levels and codes. ....                                       | 15 |
| 44 | <b>Tab. S6.</b> CCD design and response values.....                                              | 16 |
| 45 | <b>Tab. S7.</b> ANOVA for COD removal rate.....                                                  | 17 |
| 46 | <b>Tab. S8.</b> ANOVA for TN removal rate.....                                                   | 18 |
| 47 | <b>Tab. S9.</b> ANOVA for TP removal rate. ....                                                  | 19 |
| 48 | <b>Tab. S10.</b> Significance of quadratic model coefficient of COD removal rate.....            | 20 |
| 49 | <b>Tab. S11.</b> Significance of quadratic model coefficient of TN removal rate.....             | 21 |
| 50 | <b>Tab. S12.</b> Significance of quadratic model coefficient of TP removal rate. ....            | 22 |
| 51 | <b>Tab. S13.</b> Water quality of CSOs under different weather conditions (Number corresponds to |    |
| 52 | Table S1) .....                                                                                  | 23 |

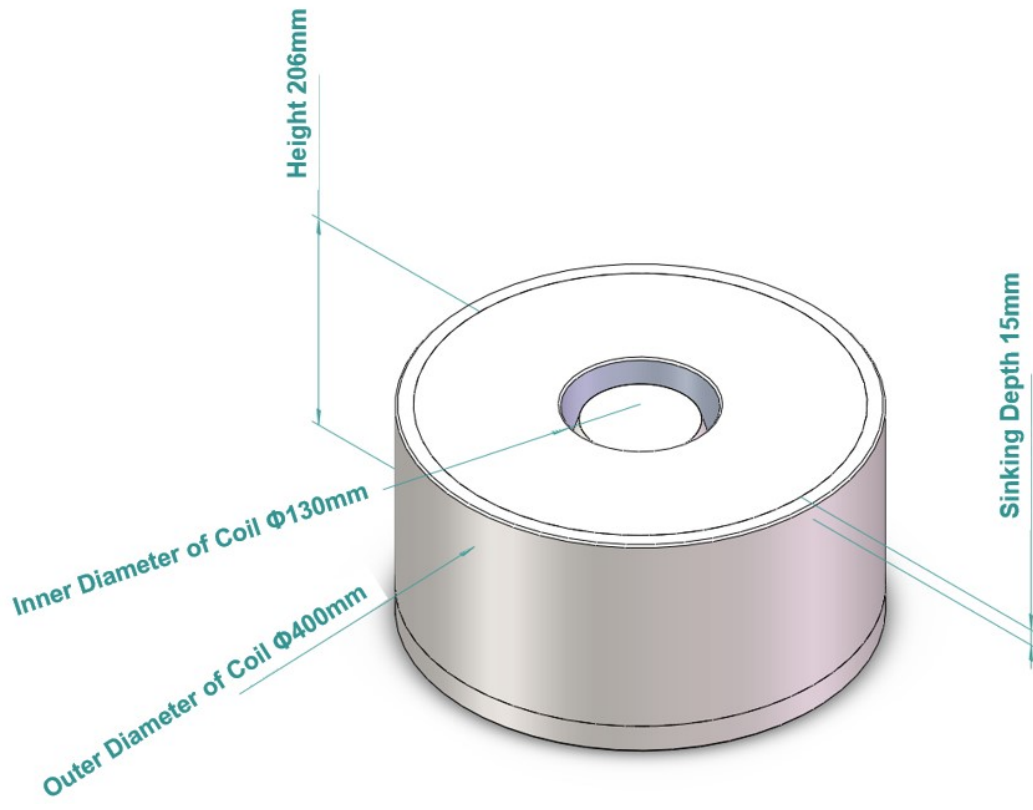

54

55 **Fig. S1.** External dimensions of magnetic field generation system.

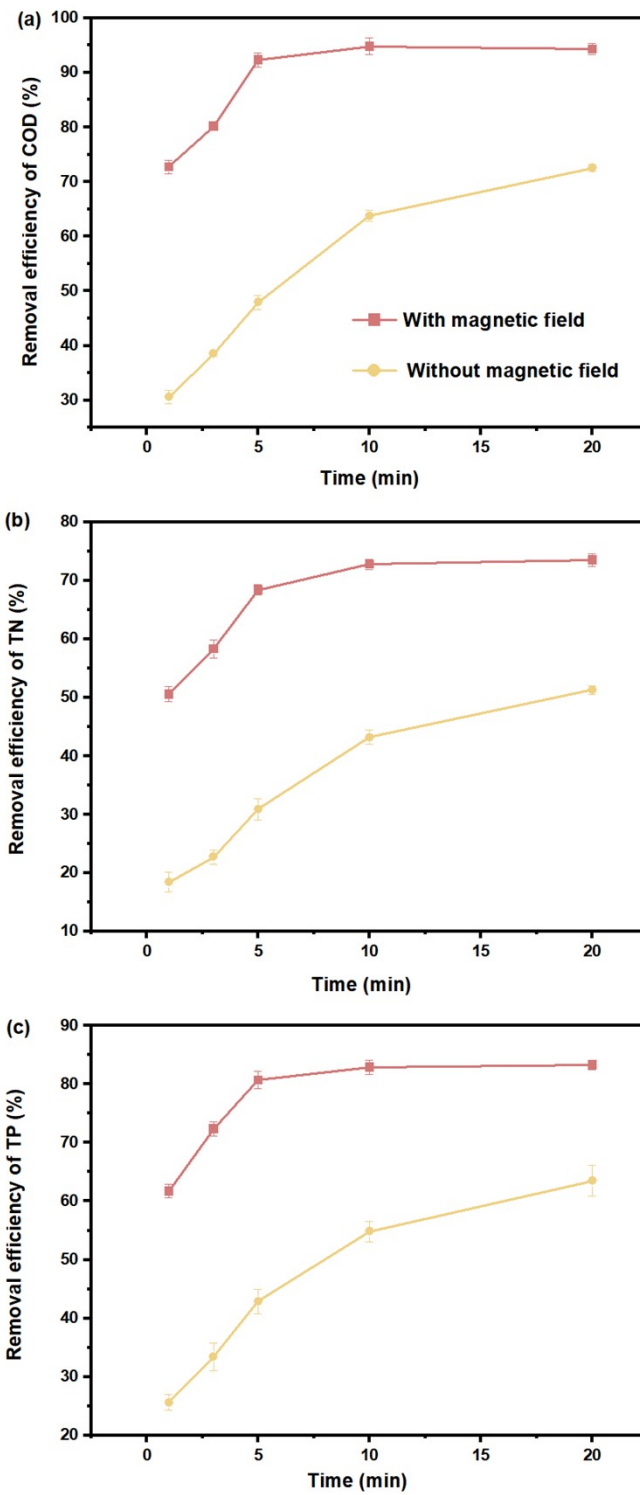

56

57 **Fig. S2.** Effects of settling method and settling time on the removal efficiency of COD, TN, and TP,

58  $\text{pH} = 7.0 \pm 0.1$ ,  $T = 25 \pm 1 \text{ } ^\circ\text{C}$ .

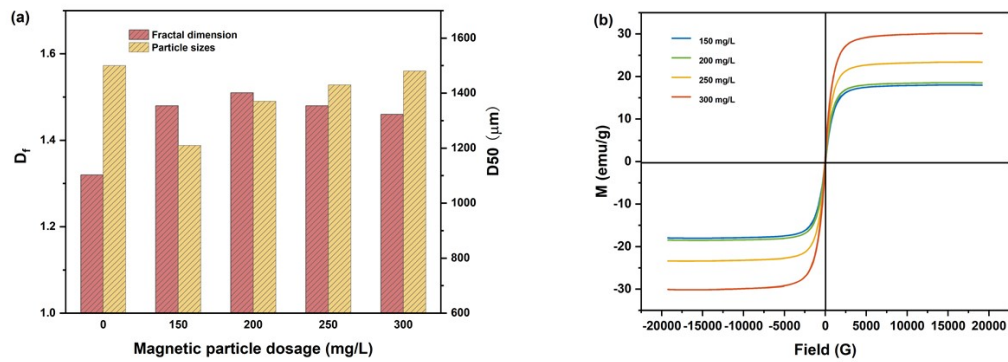

59

60 **Fig. S3.** Particle sizes, fractal dimensions (a) and saturation magnetization intensity (b) of magnetic

61 coagulation with different magnetic particle dosages, pH = 7.0 ± 0.1, T = 25 ± 1 °C.

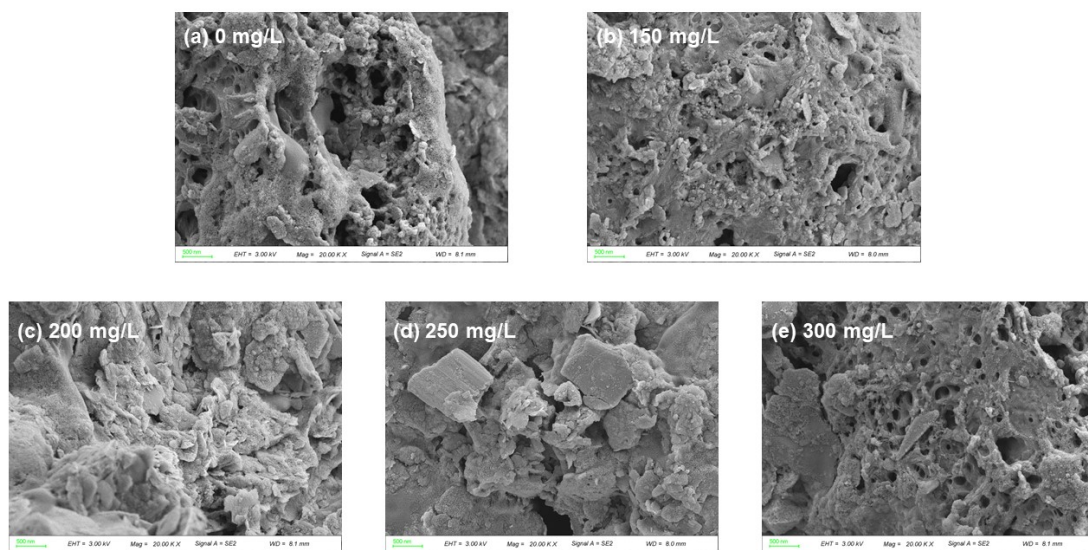

62

63 **Fig. S4.** Morphological structures of the flocs generated by different magnetic particle dosages, pH

64  $= 7.0 \pm 0.1$ ,  $T = 25 \pm 1$  °C.

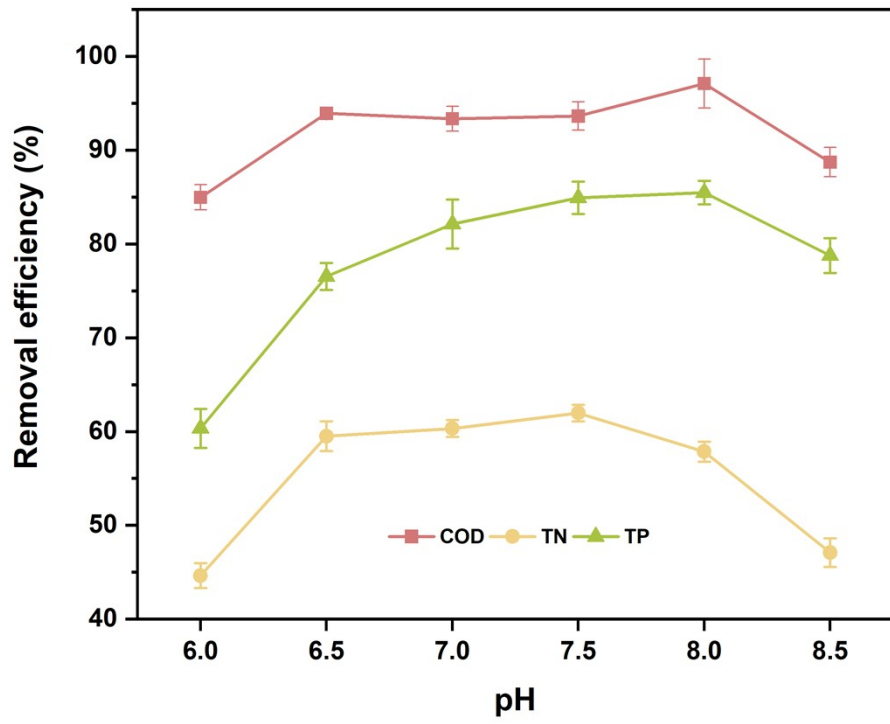

65

66 **Fig. S5.** Effects of pH on the removal efficiency of COD, TN, and TP,  $T = 25 \pm 1$  °C.



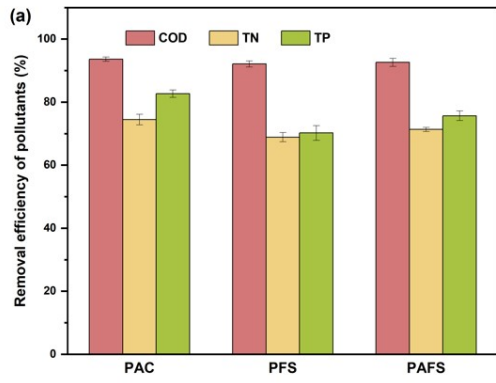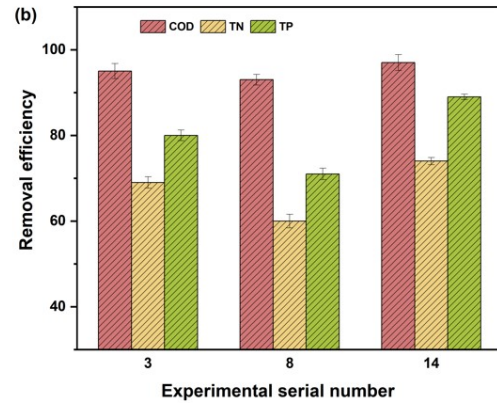

67

68 **Fig. S6.** Validation experiments conducted on typical CSO with high pollution. pH  $7.0 \pm 0.1$ , T =

69  $25 \pm 1$  °C.

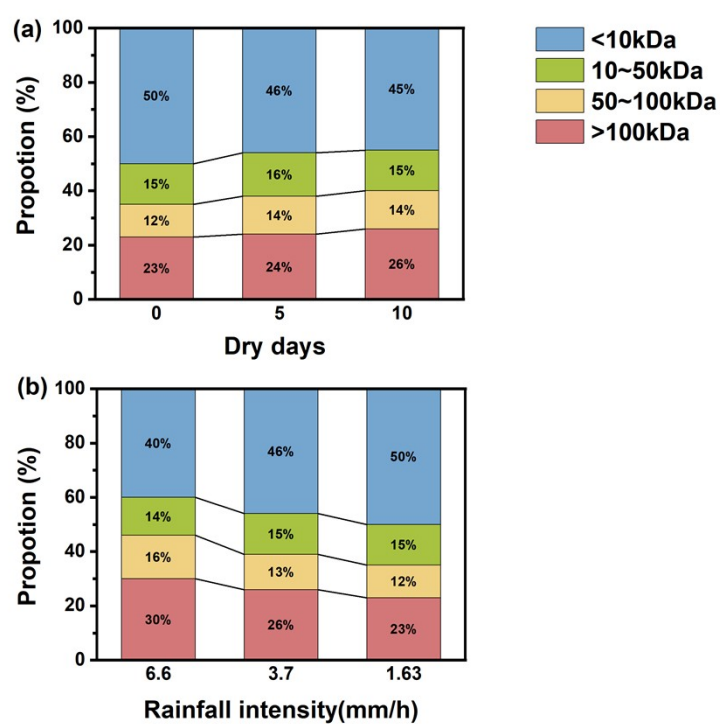

70

71 **Fig. S7.** Effect of weather conditions on the molecular weight distribution of dissolved organic

72 matter in CSOs. The number of sunny days in the early stage for the samples in (a) was 0, while the

73 average rainfall intensity for the samples in (b) was 1.67 mm/h.

74 **Tab. S1.** Rainfall conditions of different CSOs.

|   | Rainfall duration /h | Accumulated rainfall /mm | Average rainfall intensity /mm·h <sup>-1</sup> | Sunny days /d |
|---|----------------------|--------------------------|------------------------------------------------|---------------|
| 1 | 2.5                  | 16.5                     | 6.6                                            | 0             |
| 2 | 15.0                 | 55.5                     | 3.7                                            | 0             |
| 3 | 10.0                 | 16.3                     | 1.63                                           | 0             |
| 4 | 7.5                  | 12.0                     | 1.6                                            | 5             |
| 5 | 6.0                  | 9.0                      | 1.5                                            | 10            |
| 6 | 4.0                  | 30.0                     | 7.5                                            | 0             |
| 7 | 3.0                  | 33.4                     | 11.1                                           | 0             |

75

76 **Tab. S2.** Specific parameters of magnetic field generation system.

| DB-130C Unipolar electromagnet |                |                |                      |                                |                    |
|--------------------------------|----------------|----------------|----------------------|--------------------------------|--------------------|
| Input voltage                  | Output voltage | Output current | Maximum output power | Magnetic field intensity range | index of stability |
| 220V                           | 0-170V         | 0-10A          | 1700W                | 0-400mT                        | ≤3%                |

77

78 **Tab. S3.** Level of factors.

| Levels | Factors                |                        |                                 |                               |
|--------|------------------------|------------------------|---------------------------------|-------------------------------|
|        | PAC dosage<br>/ (mg/L) | PAM dosage<br>/ (mg/L) | Slow stirring rate /<br>(r/min) | Slow stirring time<br>/ (min) |
| 1      | 50                     | 0.5                    | 100                             | 1.5                           |
| 2      | 100                    | 1                      | 150                             | 2                             |
| 3      | 150                    | 1.5                    | 200                             | 2.5                           |
| 4      | 200                    | 2                      | 250                             | 3                             |

79

80 **Tab. S4.** Orthogonal experimental results.

| Experimental Serial Number | PAC dosage / (mg/L) | PAM dosage / (mg/L) | Slow stirring rate / (rpm/min) | Slow stirring time / (min) | COD removal efficiency / (%) | TN removal efficiency / (%) | TP removal efficiency / (%) |
|----------------------------|---------------------|---------------------|--------------------------------|----------------------------|------------------------------|-----------------------------|-----------------------------|
| 1                          | 50                  | 0.5                 | 100                            | 1.5                        | 73.83                        | 40.10                       | 49.70                       |
| 2                          | 50                  | 1                   | 150                            | 2                          | 79.65                        | 36.89                       | 47.36                       |
| 3                          | 50                  | 1.5                 | 200                            | 2.5                        | 84.88                        | 42.78                       | 45.02                       |
| 4                          | 50                  | 2                   | 250                            | 3                          | 85.46                        | 40.64                       | 46.19                       |
| 5                          | 100                 | 0.5                 | 150                            | 2.5                        | 84.30                        | 42.24                       | 56.72                       |
| 6                          | 100                 | 1                   | 100                            | 3                          | 82.55                        | 41.17                       | 60.23                       |
| 7                          | 100                 | 1.5                 | 250                            | 1.5                        | 84.88                        | 42.78                       | 55.55                       |
| 8                          | 100                 | 2                   | 200                            | 2                          | 81.39                        | 38.50                       | 56.72                       |
| 9                          | 150                 | 0.5                 | 200                            | 3                          | 83.13                        | 43.31                       | 62.52                       |
| 10                         | 150                 | 1                   | 250                            | 2.5                        | 86.62                        | 42.78                       | 64.32                       |
| 11                         | 150                 | 1.5                 | 100                            | 2                          | 83.13                        | 40.10                       | 57.89                       |
| 12                         | 150                 | 2                   | 150                            | 1.5                        | 79.65                        | 37.96                       | 61.40                       |
| 13                         | 200                 | 0.5                 | 250                            | 2                          | 83.72                        | 37.96                       | 61.98                       |
| 14                         | 200                 | 1                   | 200                            | 1.5                        | 83.13                        | 43.85                       | 73.68                       |
| 15                         | 200                 | 1.5                 | 150                            | 3                          | 84.88                        | 41.71                       | 67.83                       |
| 16                         | 200                 | 2                   | 100                            | 2.5                        | 83.13                        | 43.85                       | 69.00                       |

82 **Tab. S5.** Experimental factor levels and codes.

| Factors                         | Levels |     |     |     |        |
|---------------------------------|--------|-----|-----|-----|--------|
|                                 | -1.414 | -1  | 0   | 1   | 1.414  |
| Magnetic particle dosage (mg/L) | 129.29 | 150 | 200 | 250 | 270.71 |
| Magnetic field intensity (mT)   | 108.58 | 150 | 250 | 350 | 391.42 |

83

84 **Tab. S6.** CCD design and response values.

| Run | Real values |        | Response           |                    |                    |
|-----|-------------|--------|--------------------|--------------------|--------------------|
|     | A (mg/L)    | B (mT) | Y <sub>1</sub> (%) | Y <sub>2</sub> (%) | Y <sub>3</sub> (%) |
| 1   | 150         | 150    | 91.5               | 72.7               | 79.54              |
| 2   | 250         | 150    | 92.1               | 75.2               | 85                 |
| 3   | 150         | 350    | 92.7               | 75.5               | 85.34              |
| 4   | 250         | 350    | 93.3               | 78.7               | 86.02              |
| 5   | 129.29      | 250    | 92.4               | 73.9               | 83.64              |
| 6   | 270.71      | 250    | 93                 | 78.4               | 85.68              |
| 7   | 200         | 108.59 | 92.7               | 76.5               | 84.66              |
| 8   | 200         | 391.42 | 93.3               | 80                 | 87.04              |
| 9   | 200         | 250    | 93.2               | 80.3               | 87.39              |
| 10  | 200         | 250    | 93.6               | 81.3               | 88.27              |
| 11  | 200         | 250    | 93.5               | 79.4               | 86.45              |
| 12  | 200         | 250    | 93.7               | 80.5               | 87.23              |
| 13  | 200         | 250    | 93.9               | 81                 | 87.96              |



86 **Tab. S7.** ANOVA for COD removal rate.

| Item        | Sum of squares | Degrees of freedom | Mean square | F-value | Prob. > F |
|-------------|----------------|--------------------|-------------|---------|-----------|
| Model       | 4.74           | 4                  | 1.18        | 9.58    | 0.0038    |
| Residual    | 0.99           | 8                  | 0.12        | —       | —         |
| Lack of fit | 0.72           | 4                  | 0.18        | 2.69    | 0.18      |
| Pure error  | 0.27           | 4                  | 0.07        | —       | —         |

87 Notes:  $R^2$ : determination coefficient,  $R^2_{Adj}$ : adjusted  $R^2$ ,  $R^2_{Pred}$ : predetermined  $R^2$ , CV: coefficient  
88 of variation, AP: adequate precision. Values for the reduced model with significant coefficients,  $R^2$   
89 = 0.8273,  $R^2_{Adj}$  = 0.7410,  $R^2_{Pred}$  = 0.3181, CV = 0.3782 %, AP = 7.4149.

90 **Tab. S8.** ANOVA for TN removal rate.

| Item        | Sum of squares | Degrees of freedom | Mean square | F-value | Prob. > F |
|-------------|----------------|--------------------|-------------|---------|-----------|
| Model       | 91.13          | 4                  | 22.78       | 22.34   | 0.0002    |
| Residual    | 8.16           | 8                  | 1.02        | —       | —         |
| Lack of fit | 5.95           | 4                  | 1.49        | 2.69    | 0.18      |
| Pure error  | 2.21           | 4                  | 0.55        | —       | —         |

91 Notes:  $R^2$ : determination coefficient,  $R^2_{Adj}$ : adjusted  $R^2$ ,  $R^2_{Pred}$ : predetermined  $R^2$ , CV: coefficient  
 92 of variation, AP: adequate precision. Values for the reduced model with significant coefficients,  $R^2$   
 93 = 0.9178,  $R^2_{Adj}$  = 0.8768,  $R^2_{Pred}$  = 0.6778, CV = 1.2948 %, AP = 11.6617.

94 **Tab. S9.** ANOVA for TP removal rate.

| Item        | Sum of squares | Degrees of freedom | Mean square | F-value | Prob. > F |
|-------------|----------------|--------------------|-------------|---------|-----------|
| Model       | 49.47          | 4                  | 12.37       | 7.17    | 0.0093    |
| Residual    | 13.79          | 8                  | 1.72        | —       | —         |
| Lack of fit | 11.80          | 4                  | 2.95        | 5.95    | 0.0561    |
| Pure error  | 1.98           | 4                  | 0.49        | —       | —         |

95 Notes:  $R^2$ : determination coefficient,  $R^2_{Adj}$ : adjusted  $R^2$ ,  $R^2_{Pred}$ : predetermined  $R^2$ , CV: coefficient  
 96 of variation, AP: adequate precision. Values for the reduced model with significant coefficients,  $R^2$   
 97 = 0.8723,  $R^2_{Adj}$  = 0.7811,  $R^2_{Pred}$  = 0.2661, CV = 1.2533 %, AP = 8.8269.

98 **Tab. S10.** Significance of quadratic model coefficient of COD removal rate.

| Independent variables | Degrees of freedom | Standard error | Prob. > F |
|-----------------------|--------------------|----------------|-----------|
| A                     | 1                  | 0.13           | 0.0954    |
| B                     | 1                  | 0.13           | 0.0185    |
| AB                    | 1                  | 0.19           | 0.9999    |
| A <sup>2</sup>        | 1                  | 0.14           | 0.0061    |
| B <sup>2</sup>        | 1                  | 0.14           | 0.0256    |

100 **Tab. S11.** Significance of quadratic model coefficient of TN removal rate.

| Independent variables | Degrees of freedom | Standard error | Prob. > F |
|-----------------------|--------------------|----------------|-----------|
| A                     | 1                  | 0.38           | 0.0055    |
| B                     | 1                  | 0.38           | 0.0075    |
| AB                    | 1                  | 0.54           | 0.7741    |
| A <sup>2</sup>        | 1                  | 0.41           | 0.0004    |
| B <sup>2</sup>        | 1                  | 0.41           | 0.0064    |

102 **Tab. S12.** Significance of quadratic model coefficient of TP removal rate.

| Independent variables | Degrees of freedom | Standard error | Prob. > F |
|-----------------------|--------------------|----------------|-----------|
| A                     | 1                  | 0.37           | 0.02079   |
| B                     | 1                  | 0.37           | 0.0122    |
| AB                    | 1                  | 0.53           | 0.0614    |
| A <sup>2</sup>        | 1                  | 0.40           | 0.0039    |
| B <sup>2</sup>        | 1                  | 0.40           | 0.0280    |

103

104 **Tab. S13.** Water quality of CSOs under different weather conditions (Number corresponds to Table  
105 S1)

|   | COD<br>(mg/L) | SCOD<br>(mg/L) | TN<br>(mg/L) | STN<br>(mg/L) | TP<br>(mg/L) | STP<br>(mg/L) | NH <sub>3</sub> -N<br>(mg/L) | SNH <sub>3</sub> -N<br>(mg/L) |
|---|---------------|----------------|--------------|---------------|--------------|---------------|------------------------------|-------------------------------|
| 1 | 1210          | 112            | 36           | 10            | 1100         | 22.6          | 6.1                          | 20.3                          |
| 2 | 810           | 82             | 23.5         | 6.8           | 700          | 13.5          | 6.3                          | 17.2                          |
| 3 | 172           | 38             | 18.7         | 11.8          | 270          | 8.55          | 6.8                          | 11.3                          |
| 4 | 400           | 52             | 20.5         | 10.1          | 500          | 17.1          | 9.2                          | 15.5                          |
| 5 | 460           | 47             | 21.7         | 10.6          | 560          | 13.8          | 7.3                          | 15.1                          |
| 6 | 1130          | 104            | 31           | 9             | 1200         | 18.4          | 6.7                          | 18.7                          |
| 7 | 1400          | 140            | 42           | 11.7          | 1600         | 12.3          | 3.4                          | 18.9                          |

106
